# Supplementary material for: ATP-competitive partial antagonists of the IRE1α RNase segregate outputs of the UPR
Source: Springer Nature journal article supplement (doi:10.1038/s41589-021-00852-0), 2021-09-23
Supplement: 41589_2021_852_MOESM13_ESM.mol [file 41589_2021_852_MOESM13_ESM.mol]

nchembio.A201212481B-comp7.mol
  ChemDraw06302111542D

 38 43  0  0  0  0  0  0  0  0999 V2000
   -4.3433   -1.8562    0.0000 C   0  0  0  0  0  0  0  0  0  0  0  0
   -4.3433   -2.6812    0.0000 C   0  0  0  0  0  0  0  0  0  0  0  0
   -3.6288   -3.0937    0.0000 C   0  0  0  0  0  0  0  0  0  0  0  0
   -2.9144   -2.6812    0.0000 C   0  0  0  0  0  0  0  0  0  0  0  0
   -2.9144   -1.8562    0.0000 C   0  0  0  0  0  0  0  0  0  0  0  0
   -3.6288   -1.4437    0.0000 C   0  0  0  0  0  0  0  0  0  0  0  0
   -3.6288   -3.9187    0.0000 N   0  0  0  0  0  0  0  0  0  0  0  0
   -3.6288   -0.6187    0.0000 N   0  0  0  0  0  0  0  0  0  0  0  0
   -2.9144   -0.2062    0.0000 C   0  0  0  0  0  0  0  0  0  0  0  0
   -2.1999   -0.6187    0.0000 N   0  0  0  0  0  0  0  0  0  0  0  0
   -1.4854   -0.2062    0.0000 C   0  0  0  0  0  0  0  0  0  0  0  0
   -1.4854    0.6187    0.0000 C   0  0  0  0  0  0  0  0  0  0  0  0
   -2.1999    1.0313    0.0000 C   0  0  0  0  0  0  0  0  0  0  0  0
   -2.9144    0.6187    0.0000 N   0  0  0  0  0  0  0  0  0  0  0  0
   -0.7709   -0.6187    0.0000 C   0  0  0  0  0  0  0  0  0  0  0  0
   -0.7709   -1.4437    0.0000 C   0  0  0  0  0  0  0  0  0  0  0  0
   -0.0565   -1.8562    0.0000 C   0  0  0  0  0  0  0  0  0  0  0  0
    0.6580   -1.4437    0.0000 C   0  0  0  0  0  0  0  0  0  0  0  0
    0.6580   -0.6187    0.0000 N   0  0  0  0  0  0  0  0  0  0  0  0
   -0.0565   -0.2062    0.0000 C   0  0  0  0  0  0  0  0  0  0  0  0
   -0.0565    0.6188    0.0000 O   0  0  0  0  0  0  0  0  0  0  0  0
    0.6580    1.0313    0.0000 C   0  0  0  0  0  0  0  0  0  0  0  0
    1.3725    0.6188    0.0000 C   0  0  0  0  0  0  0  0  0  0  0  0
    2.0869    1.0313    0.0000 C   0  0  0  0  0  0  0  0  0  0  0  0
    2.0869    1.8562    0.0000 C   0  0  0  0  0  0  0  0  0  0  0  0
    1.3725    2.2687    0.0000 C   0  0  0  0  0  0  0  0  0  0  0  0
    0.6580    1.8562    0.0000 C   0  0  0  0  0  0  0  0  0  0  0  0
    4.3433    2.6799    0.0000 C   0  0  0  0  0  0  0  0  0  0  0  0
    4.3433    3.5076    0.0000 C   0  0  0  0  0  0  0  0  0  0  0  0
    1.9764    3.0938    0.0000 O   0  0  0  0  0  0  0  0  0  0  0  0
    2.8014    3.9187    0.0000 O   0  0  0  0  0  0  0  0  0  0  0  0
    3.6264    3.0938    0.0000 C   0  0  0  0  0  0  0  0  0  0  0  0
    2.8014    3.0938    0.0000 S   0  0  0  0  0  0  0  0  0  0  0  0
    2.8014    2.2687    0.0000 N   0  0  0  0  0  0  0  0  0  0  0  0
    1.3725    3.0938    0.0000 C   0  0  0  0  0  0  0  0  0  0  0  0
    0.6580    3.5063    0.0000 C   0  0  0  0  0  0  0  0  0  0  0  0
   -0.0565    3.0938    0.0000 C   0  0  0  0  0  0  0  0  0  0  0  0
   -0.0565    2.2687    0.0000 C   0  0  0  0  0  0  0  0  0  0  0  0
  1  2  1  0      
  2  3  1  0      
  3  4  1  0      
  4  5  1  0      
  5  6  1  0      
  6  1  1  0      
  3  7  1  1      
  6  8  1  6      
  8  9  1  0      
  9 10  2  0      
 10 11  1  0      
 11 12  2  0      
 12 13  1  0      
 13 14  2  0      
 14  9  1  0      
 11 15  1  0      
 15 16  2  0      
 16 17  1  0      
 17 18  2  0      
 18 19  1  0      
 19 20  2  0      
 20 15  1  0      
 20 21  1  0      
 21 22  1  0      
 22 23  2  0      
 23 24  1  0      
 24 25  2  0      
 25 26  1  0      
 26 27  2  0      
 27 22  1  0      
 28 32  1  0      
 25 34  1  0      
 29 28  1  0      
 32 29  1  0      
 33 30  2  0      
 33 31  2  0      
 33 32  1  0      
 34 33  1  0      
 26 35  1  0      
 35 36  2  0      
 36 37  1  0      
 37 38  2  0      
 38 27  1  0      
M  END
